# Vestibular and auditory hair cell regeneration following targeted ablation of hair cells with diphtheria toxin in zebrafish

Erin Jimenez<sup>1</sup>, Claire C. Slevin<sup>1</sup>, Luis Colón-Cruz<sup>1</sup>, and Shawn M. Burgess<sup>1\*</sup>

<sup>1</sup>Translational and Functional Genomics Branch, National Human Genome Research Institute, National Institutes of Health, Bethesda, MS, USA

\*Correspondence:

Shawn M. Burgess

[burgess@mail.nih.gov](mailto:burgess@mail.nih.gov)

**Keywords: cell ablation, hair cell regeneration, zebrafish, diphtheria toxin, inner ear, hearing, hair cell loss**

## Abstract

Millions of Americans experience hearing or balance disorders due to loss of hair cells in the inner ear. The hair cells are mechanosensory receptors used in the auditory and vestibular organs of all vertebrates as well as the lateral line systems of aquatic vertebrates. In zebrafish and other non-mammalian vertebrates, hair cells turn over during homeostasis and regenerate completely after being destroyed or damaged by acoustic or chemical exposure. However in mammals, destroying or damaging hair cells results in permanent impairments to hearing or balance. We sought an improved method for studying hair cell damage and regeneration in adult aquatic vertebrates by generating a transgenic zebrafish with the capacity for targeted and inducible hair cell ablation *in vivo*. This model expresses the human diphtheria toxin receptor (hDTR) gene under the control of the *myo6b* promoter, resulting in hDTR expressed only in hair cells. Cell ablation is achieved by an intraperitoneal injection of diphtheria toxin (DT) in adult zebrafish or DT dissolved in the water for larvae. In the lateral line of 5 dpf zebrafish, ablation of hair cells by DT treatment occurred within 2 days in a dose-dependent manner. Similarly, in adult utricles and saccules, a single intraperitoneal injection of 0.05 ng DT caused complete loss of hair cells in the utricle and saccule by 5 days post-injection. Full hair cell regeneration was observed for the lateral line and the inner ear tissues. This study introduces a new method for efficient conditional hair cell ablation in adult zebrafish inner ear sensory epithelia (utricles and saccules) and demonstrates that zebrafish hair cells will regenerate *in vivo* after this treatment.

## Introduction

Loss of hearing or balance can be debilitating and imposes a significant personal, societal, and economic burden upon individuals, their families and communities. Approximately 37.5 million Americans report some degree of hearing loss with incidences increasing with age. 33.4 million adults reported a problem during the past 12 months with balance, unsteadiness, or blurred vision after moving their head. Hearing and balance disorders are most often attributed to loss or damage to the sensory hair cells of the auditory and vestibular organs. The hair cells are mechanosensory receptors that receive signals from our environment and transmit them to the brain. These hair cells reside in the sensory epithelia of auditory and vestibular organs in all vertebrates as well as in the lateral line

43 systems of aquatic vertebrates (Popper and Fay, 1993; Bever and Fekete, 2002; Nicolson,  
44 2005). In zebrafish and non-mammalian vertebrates, hair cells turn over during homeostasis  
45 and regenerate completely after being damaged or destroyed by acoustic or chemical  
46 exposure, while in mammals, destroying or damaging hair cells results in permanent  
47 impairments to hearing and balance. Mammalian hair cell regeneration has been observed  
48 but in a very limited fashion in the auditory and vestibular organs of embryonic and newborn  
49 mice and mature adults (Burns et al., 2012; Golub et al., 2012; Bucks et al., 2017). Since  
50 the majority of hearing and balance disorders in humans are due to the loss or damage of  
51 hair cells, understanding how to stimulate the hair cell regeneration process in the  
52 mammalian inner ear represents a direct solution to hearing loss or vestibular problems.

53  
54 The zebrafish is an excellent genetic model to understand hair cell regeneration and inner  
55 ear function. Yet, the majority of zebrafish hair cell regeneration and inner ear research to  
56 date has focused on the larval lateral line due to its relatively simple structure and  
57 accessibility. Lateral line regeneration occurs through support cell proliferation and  
58 differentiation. Larval lateral line hair cells frequently undergo apoptosis, constant turnover,  
59 and are renewed by peripheral supporting cell division. In the adult inner ear, the sensory  
60 epithelium continues to expand for the first 10 months of life and subsequently have a low  
61 but measurable turnover of hair cells (Higgs et al., 2002).

62  
63 To uncover detailed mechanisms of hair cell regeneration in animals that possess the  
64 capacity to regenerate hearing, frequently used models for experimental hair cell  
65 destruction in adult fish include acoustic overstimulation/sound exposure (Smith et al., 2004;  
66 Schuck et al., 2009; Liang et al., 2012), blast wave exposure (Wang et al., 2019), and  
67 aminoglycoside antibiotics (Uribe et al., 2013). However, sound exposure experiments  
68 achieved  $\leq 75\%$  hair cell ablation and only in the auditory organs while blast wave exposure  
69 elicited more serious hearing loss phenotypes, but also caused brain injury with increased  
70 cell apoptosis and decreased neurogenesis. Aminoglycoside administration using a high  
71 dose of gentamicin induced only a 15% reduction in sensory hair cell loss across the entire  
72 saccule and utricle.

73  
74 In order to investigate the mechanism of hair cell regeneration in adult auditory and  
75 vestibular organs, we sought to establish a robust new model for hearing loss and  
76 regeneration research by generating a transgenic zebrafish with the capacity for targeted  
77 and inducible hair cell ablation in vivo. The gene encoding the human diphtheria toxin  
78 receptor was placed downstream of the zebrafish *myo6b* promoter whose expression is  
79 limited to differentiated hair cells in zebrafish. Since the orthologous zebrafish receptor has  
80 a significantly lower affinity to diphtheria toxin than the human one, treatment with diphtheria  
81 toxin results in hair cell specific ablation with minimal systemic side effects. Here we show  
82 that a single, low concentration, intraperitoneal injection of DT in the Tg(*myo6b*:hDTR)  
83 transgenic background caused complete loss of hair cells in the adult zebrafish utricle and  
84 saccule and that over time the hair cells regenerated. We also show that diphtheria toxin  
85 exposure ablated larval lateral line hair cells in a dose-dependent manner. This ablation  
86 approach could also be used in other tissues where cell-specific ablation is desirable in  
87 zebrafish.

## 88 89 **Materials and Methods**

### 90 91 *Experimental Animals*

92

93 TAB5 wild-type (WT) zebrafish were used in this study. Fish were randomly selected and  
94 represented roughly equal numbers of males and females. All animal experiments were  
95 approved by the Institutional Animal Care and Use Committee under Animal Study Protocol:  
96 G-01-3.

97

### 98 *Generation of myo6b-DTR zebrafish*

99

100 We targeted expression of the human diphtheria toxin receptor (heparin-binding epidermal  
101 growth factor precursor; proHB-EGF) to zebrafish hair cells by using the hair cell-specific  
102 *myo6b* promoter (Kindt et al., 2012). We generated the Tg(*myo6b*:hDTR) construct as  
103 follows. The full coding region of the hDTR gene (Genscript Clone ID OHu26607D) was  
104 PCR amplified with the following 5' adaptor (attB) sequences to increase the specificity of  
105 cloning orientation (Forward primer adds attB1 site 5'-  
106 GGGGACAAGTTTGTACAAAAAAGCAGGCTTAACCCACTGCTTACTGGCTTA-3' and  
107 Reverse Primer adds attB2 site and a stop codon 5'-  
108 GGGGACCACTTTGTACAAGAAAGCTGGGTACTAAGGACAGTCGAGG-3'. A  
109 middle entry clone was generated by performing a BP recombination between the attB  
110 hDTR PCR product with the pDONR 221 clone. The hDTR-pDONR221 middle entry clone  
111 was verified by restriction digest and sequencing. To create a Gateway expression clone,  
112 an LR reaction was performed using a 5' Entry *myo6b* clone (gift from Dr. Katie Kindt),  
113 hDTR middle entry clone, 3' Entry PolyA clone, and destination vector pDestTol2CG2. The  
114 *myo6b*:hDTR construct was verified by sequencing and injected into TAB5 1-cell stage  
115 embryos with mRNA encoding the Tol2 transposase (Kawakami et al., 2000). All  
116 experimental zebrafish used in this study were heterozygous, Tg(*myo6b*:hDTR).

117

### 118 *In-Situ Hybridization Chain Reaction (HCR)*

119

120 3 dpf embryos were fixed in a 4% formaldehyde solution and stored overnight in 100%  
121 methanol. Embryos were rehydrated with a series of graded 1 mL methanol/PBST washes  
122 (75% methanol, 50% methanol, 25% methanol) for 5 minutes and then rinsed 5 times in  
123 PBST (0.1% Tween-20) for 5 min. Embryos were treated with 1 mL of proteinase K (2  
124 mg/mL) for 10 minutes at room temperature followed by two washes with PBST without  
125 incubation. Embryos were then postfixed with a 4% formaldehyde solution for 20 minutes at  
126 room temperature. Following fixation, embryos were washed 5 times for 5 minutes with  
127 PBST. Embryos were hybridized with HCR probes that were purchased commercially  
128 (Molecular Instruments, Inc.) and targeted hDTR (HBEGF, NM\_001945.3) and Myo6b  
129 (NM\_001004110.1). Detection and amplification was performed in accordance with the  
130 HCR v3.0 protocol for whole-mount zebrafish embryos and larvae (Choi et al., 2016).  
131 Embryos were mounted in 0.8% low melting agarose and imaged on a Zeiss LSM 880  
132 confocal microscope. Maximum intensity projections of z-stacks were generated in Image  
133 J/Fiji software (Schindelin et al., 2012).

134

### 135 *RNA isolation from adult inner ear tissues*

136

137 Saccules and utricles were dissected from adult wild-type and Tg(*myo6b*:hDTR) zebrafish  
138 and homogenized in 0.7 mL TRIzol Reagent (Thermo Fisher Scientific, USA) with a power  
139 homogenizer. RNA was isolated from aqueous phase after TRIzol/chloroform extraction and

140 treated with DNase I. RNA was purified using the RNA Clean & Concentrator-5 (Zymo  
141 Research) and measured (Nanodrop One).

142

### 143 *Quantitative real-time PCR analysis (RT-qPCR) on adult inner ear tissues*

144

145 RNA was transcribed into cDNA according to manufacturer's instructions (SuperScript III  
146 RT, Thermo Fisher Scientific, USA). RT-qPCR was performed in technical replicates using  
147 1:1 cDNA in each reaction and a primer concentration of 0.5uM. PowerUp SYBR Green  
148 Master Mix (Thermo Fisher Scientific Cat, #4344463, USA) and self-designed primers were  
149 used (Eurofins, Luxembourg). Primers were designed by using Primer3 followed by a UCSC  
150 In-Silico PCR to search the zebrafish sequence database. hDTR was amplified using the  
151 forward primer 5' - GACCCTCCCACTGTATCCAC - 3' and the reverse primer 5' -  
152 GCTCCTCCTTGTGGTGTG - 3'. myo6b was amplified using the forward primer 5' -  
153 ATTAAGAGCTATCAGGGACGC - 3' and the reverse primer 5' -  
154 GCTCATCTTCAGAACCCTCAT - 3'. ef1alpha was used as a housekeeping gene and was  
155 amplified using the forward primer 5' - CGACAAGAGAACCATCGAGAAGTT - 3' and the  
156 reverse primer 5' - CCAGGCGTACTTGAAGGA - 3'.

157

### 158 *Larval Zebrafish Diphtheria Toxin Treatments*

159

160 Diphtheria toxin was purchased from Sigma-Aldrich (D0564). 5 dpf transgenic larvae were  
161 exposed for 3 h to 12 h in various concentrations of diphtheria toxin dissolved in 1X  
162 Holtfreter's medium, washed and then maintained in 1X Holtfreter's for up to 3 days. 8 dpf  
163 zebrafish were treated with 8 µM YO-PRO-1 dye (Y3603, Molecular Probes, OR, USA)  
164 dissolved in 1X Holtfreter's medium for 1 hour at 28.5°C. After washing, fish were lightly  
165 anaesthetized with 0.01% tricaine and placed in 96-well, glass bottomed plates for  
166 observation. Stained neuromasts in the lateral trunk region were visualized and quantified  
167 with an inverted Leica stereomicroscope using a 10X objective. For time-course  
168 experiments, larvae were returned to 1X Holtfreter's medium for recovery.

169

### 170 *Adult Zebrafish Diphtheria Toxin Administration*

171

172 Diphtheria toxin (DT) was dissolved in 1XPBS. 6 to 10 month-old wild-type (TAB5) and  
173 transgenic adult zebrafish of mixed sex were injected one time with diphtheria toxin into the  
174 abdominal cavity, posterior to the pelvic girdle, using a microsyringe for nanoliter injection  
175 with a 35G beveled needle. Concentration ranges from 0.01 ng to 50 ng per fish were  
176 tested. Before intraperitoneal injection, fish were fasted for 24 hours and then lightly  
177 anesthetized with buffered MS-222. Immediately after injection, fish recovered in fresh  
178 system water and maintained off system for up to 14 days. Fish were fed and water  
179 changed once daily. Health and water quality inspections were completed twice daily.

180

### 181 *Histological Methods*

182

183 Adult zebrafish were euthanized using buffered MS-222. The heads were dissected and  
184 fixed in 4% formaldehyde overnight at 4°C. Inner ears were dissected as previously  
185 described in Liang and Burgess, 2009.

186

### 187 *Hair Cell Labelling*

188

189 Alexa Fluor 488 phalloidin was used to visualize and quantify F-actin in stereocilia of  
190 zebrafish. Utricles and saccules were dissected and stained using Alexa Fluor 488  
191 phalloidin as previously described in Liang, 2009 and 2012. Proteins were detected in  
192 whole-mount utricles and saccules using standard immunofluorescence labeling methods.  
193 Following overnight fixation, inner ear sensory epithelia were rinsed several times in PBTX  
194 (PBS plus 0.1% Triton X-100) and blocked for 1 hour in BBTX at room temperature (PBS  
195 plus 0.5% BSA, 2% NGS, and 0.1% Triton X-100). Inner ear sensory epithelia were  
196 incubated overnight at 4°C with primary antibodies. Inner ears were washed three times for  
197 10 minutes in PBTX and then incubated overnight at 4°C with secondary antibodies in  
198 BBTX. After washing three times for 10 minutes in PBTX, inner ear sensory epithelia were  
199 incubated for 45 minutes at room temperature with Alexa Fluor 488 phalloidin in PBS  
200 (Thermo Fisher Scientific, #A12379, USA, 1:1000-dilution). Following three washes in PBS  
201 for 10 minutes, saccules (with or without lagena) and utricles were mounted in Vectashield  
202 with DAPI. Primary and secondary antibodies used include the rabbit myosin VI and myosin  
203 VIIa antibodies (Proteus Biosciences 25-6790 & 25-6791, 1:300-dilution), rabbit cleaved  
204 Caspase-3 (Cell Signaling #9661, 1:300-dilution), Alexa Fluor 568 goat anti-rabbit IgG  
205 (1:1000-dilution).

#### 206 207 *Cellular Imaging and Analysis*

209 Confocal images were acquired with a Zeiss LSM 880 confocal microscope. Confocal Z  
210 stacks of the entire saccule and utricle were projected into a single image to capture all  
211 phalloidin positive cells from different planes of focus for hair cell counting. Counts of  
212 phalloidin labelled hair cell bundles were obtained from preselected 50 µm x 50 µm digital  
213 boxes along the rostral-caudal axis of the saccule or the medial-striola planes of the utricle.  
214 Normal hair cells were quantified as hair cell bundles with intact stereocilia using Image  
215 J/Fiji software (Schindelin et al., 2012). Cleaved caspase-3 positive cells were counted with  
216 Image J/Fiji software from the entire saccule and utricle whole mount.

## 217 **Results**

### 218 *Generation of myo6b:hDTR zebrafish*

219  
220 To create a model that would allow for hair cell specific ablation, we utilized the human DTR  
221 gene, which has previously been used to effectively ablate hair cells in the mouse utricle  
222 (Golub et al., 2012). In order to drive expression of hDTR only in hair cells, we use the  
223 zebrafish hair cell specific promoter *myo6b* which is expressed in auditory, vestibular, and  
224 lateral line hair cells in zebrafish (**Figure 1A**) (Obholzer et al., 2008, Matern et al., 2018).  
225 The construct was cloned using the Gateway System into a Tol2 transposon vector and was  
226 injected with Tol2 transposase mRNA (Kawakami et al., 2000) into zebrafish embryos at the  
227 one-cell stage to create a stable transgenic line. To confirm Tg(*myo6b:hDTR*) was  
228 expressed in hair cells, we performed *in situ* hybridization chain reaction (HCR) on wild-type  
229 and Tg(*myo6b:hDTR*) 3 dpf embryos using a probe targeting the human diphtheria toxin  
230 receptor (hDTR). As expected, the hDTR fluorescent signal was present in lateral line hair  
231 cells and in the anterior macula of Tg(*myo6b:hDTR*) fish, but absent in wild-type controls.  
232 As a control, we simultaneously hybridized and detected a probe for *myo6b* in lateral line  
233 hair cells and in the anterior macula of the inner ear of Tg(*myo6b:hDTR*) and wild-type fish  
234 (**Figure 1C,D**). hDTR expression was also verified by qRT-PCR in adult zebrafish inner ear

235 auditory (sacculle) and vestibular (utricle) sensory epithelia of stable transgenic lines  
236 (**Figure 1B**).

237

238 *DT induced hair cell death and regeneration in the larval lateral line*

239

240 To determine whether DT was able to ablate hair cells of the lateral line of zebrafish  
241 expressing hDTR in hair cells, we performed a dose-response assay using 5 dpf larvae that  
242 were wild-type or heterozygous for the Tg(*myo6b*:hDTR) allele. We treated 5 dpf larvae with  
243 concentrations of dissolved DT ranging from 0.5 µg/mL to 1.5 µg/mL and continuous  
244 exposure times ranging from 3 h to 12 h (**Figure 2C**). To examine the dose-response  
245 relationship, larval neuromasts were labeled with YO-PRO-1 before and after exposure to  
246 DT. The number of YO-PRO-1 labeled cells in each of the four identified neuromasts (P1,  
247 P2, P3, P4) was determined for the different exposure concentrations and durations (**Figure**  
248 **2C**). Hair cells were assessed by fluorescence microscopy and counted for approximately 8  
249 fish per group.

250

251 DT had no effect on YO-PRO-1 staining in wild-type 5 dpf zebrafish (**Figure 2B,C**).

252 However, DT reduced YO-PRO-1 staining in 5 dpf Tg(*myo6b*:hDTR) fish in a dose-

253 dependent manner with no general toxicity or mortality at any of the doses or exposure

254 times (**Figure 2B,C**). A representative neuromast from unexposed zebrafish larvae at 5 dpf

255 and the same neuromast from larvae exposed to 1 µg/mL of DT for 6 h are shown

256 (**Supplementary Figure 1C**). Individual hair cells were brightly stained with YO-PRO-1 in

257 wild-type fish (**Figure 2B,Supplementary Figure 1B**). By comparison, larvae exposed to

258 DT showed reductions in both the intensity of YO-PRO-1 and the number of labeled hair

259 cells. At the higher exposure concentrations and longer exposure times, the YO-PRO-1

260 staining in the neuromasts was absent (**Figure 2B,C**).

261

262 We observe a delay and cumulative effect of DT on hair cell death which is likely a result of

263 diphtheria toxin's mechanism of action. The dose and time of exposure influence the

264 amount of hair cell ablation, but synchronous hair cell loss in Tg(*myo6b*:hDTR) continued

265 even after withdrawal of DT. Lower doses and longer exposure times were as effective at

266 ablating hair cells as high doses for shorter times. At 3 h incubation with 1.5 µg/mL of DT,

267 hair cells are progressively lost until 24 h post treatment, but no significant hair cell loss is

268 observed immediately with treatment at 0 h (**Figure 2C**). These data show a relationship

269 between DT concentration, exposure time, and hair cell death.

270

271 Lateral line hair cells regenerate following acute chemical injury. In Tg(*myo6b*:hDTR) larvae,

272 hair cells regenerate (defined as recovery in YO-PRO-1 labeling) when DT exposed animals

273 are removed from the toxin. To determine the time-course for recovery, hair cell

274 regeneration in the four identified neuromasts was monitored at 0, 6, 12, 24, 48, and 72 h

275 after exposure to DT. Hair cell regeneration was evident within 2 days of removal (**Figure**

276 **2B,C** and **Supplementary Figure 1C**). After 3 days, the mean number of hair cells per

277 neuromast in the transferred larvae was not significantly different from the unexposed

278 larvae indicating that recovery was complete. In contrast, larvae exposed to DT at the

279 highest (1.5 µg/mL) and longest duration (12 h) showed only partial hair cell regeneration

280 after 3 days.

281

282 *DT induced hair cell death and regeneration in the adult inner ear*

283

284 Using fluorescently-tagged phalloidin to visualize hair cell bundles and myosin VI/VIIa  
285 antibodies for hair cell bodies, we assessed utricle and saccule hair cells in untreated adult  
286 zebrafish that were wild-type or heterozygous for the *Tg(myo6b:hDTR)* allele  
287 (**Supplementary Figure 2**). Fluorescent phalloidin, a highly specific F-actin stain, was used  
288 to visualize hair cells. Hair cell bodies were labeled with myosin VI/VIIa (**Supplementary**  
289 **Figure 2**, red channel), which labels the cytoplasm of hair cells to confirm cell death (as  
290 opposed to hair cell bundle damage). Figure 3 illustrates the overall appearance of a  
291 phalloidin stained utricle and saccule (**Figure 3B**). The average hair cell densities of the  
292 untreated *Tg(myo6b:hDTR)* utricle and saccule maculae are 85 and 161 per 2.5 mm<sup>2</sup> area,  
293 respectively. Myosin VI/VIIa was present in the cytoplasm of all hair cells examined in  
294 untreated wild-type, DT treated wild-type, and untreated DTR fish (**Supplementary Figure**  
295 **2**, red channel). The pattern of phalloidin and myosin VI/VIIa labelling was consistent in  
296 treated and untreated wild-type controls and untreated *Tg(myo6b:hDTR)* sensory epithelia,  
297 although there was some variability in fluorescence intensity that was not quantified (**Figure**  
298 **4**, **Supplementary Figure 2**) (Coffin, et al., 2007). The number of hair cells per utricle and  
299 saccule did not differ significantly between these two groups and no differences were  
300 observed with respect to hair cell appearance. These observations suggested that inner ear  
301 hair cell development and maintenance were not affected in *Tg(myo6b:hDTR)* zebrafish.  
302

303 In order to determine an appropriate dose of DT to use for downstream ablation  
304 experiments in adult zebrafish, we evaluated the effect of various concentrations of injected  
305 DT (ranging from 0.01 ng to 10 ng per fish) on adult fish that were wild-type or heterozygous  
306 for the *Tg(myo6b:hDTR)* allele. No to minimal defects in swimming behaviors were  
307 observed in *Tg(myo6b:hDTR)* fish injected with 0.01-0.05 ng of DT. At concentrations above  
308 1 ng per fish (such as 10 ng), *Tg(myo6b:hDTR)* fish exhibited consistent swimming defects  
309 that come out most strongly when water is agitated (**Supplemental Video 1**). The behavior  
310 of injected *Tg(myo6b:hDTR)* fish with 10 ng of DT consisted of somersaulting and random  
311 lateral looping (**Figure 3A** of image of dorsal view of swimming patterns of adult wild-type  
312 and *Tg(myo6b:hDTR)* injected fish). *Tg(myo6b:hDTR)* injected fish mimic the swimming  
313 behavior of fish under microgravity conditions (Von Baumgarten et al., 1975), fish that have  
314 undergone laceration or removal of the utricle (Pfeiffer, W., 1964), and the *sputnik* and  
315 *orbiter* adult circler mutants with mutations affecting vestibular function (Nicolson et al.  
316 1998). The onset of swimming defects correlated to when the hair cells in the inner ear were  
317 maximally ablated (**Figure 3**). Similarly, recovery in swimming behavior correlated to when  
318 the hair cells in the inner ear regenerated.  
319

320 We characterized the time-course of hair cell loss and the minimum dose capable of  
321 completely ablating hair cells to help maximize animal viability and reduce excess stress.  
322 Similar to our observations in larval zebrafish treated with DT, we observed a delay and  
323 cumulative effect of DT on hair cell death in adult zebrafish. The dose of exposure  
324 influenced when hair cell loss was first observed and the time it took for hair cells to return.  
325 We determined a low DT dose of 0.05 ng per fish was sufficient for complete hair cell  
326 ablation throughout the utricle, saccule and even lagena followed by hair cell recovery  
327 within a 13-day window.  
328

329 Adult fish received a single intraperitoneal injection of 1 µl of 0.05 ng DT. Immediately  
330 following injection, fish were allowed to recover for up to 14 days in static tanks. Adult inner  
331 ears (utricle and saccule) were harvested following timepoints ranging from 0 to 13 days  
332 post injection. DT did not affect hair cells in injected wild-type zebrafish at all time points

333 examined. In contrast, significant hair cell loss was observed between 4 and 5 days after  
334 DT treatment in adult Tg(*myo6b*:hDTR) zebrafish (**Figure 4,5**). We confirmed elimination of  
335 hair cells (as opposed to hair cell bundle damage) by co-labeling sensory epithelia with  
336 phalloidin and myosin VI/VIIa antibodies. Phalloidin staining revealed structural changes  
337 that occurred at the epithelial surface 4 and 5 days after DT treatment such as putative  
338 lesions and bundle-less cuticular plates in the region of stereociliary loss over the time  
339 course of hair cell death. The lack of phalloidin in stereocilia and bundle-less cuticular plates  
340 correlated with the absence of myosin VI/VIIa labeling (**Figure 4**). We conclude that  
341 complete hair cell loss is achieved 5 days post-DT treatment in adult Tg(*myo6b*:hDTR)  
342 zebrafish.

343  
344 Hair cells re-emerged as indicated by the appearance of short phalloidin positive hair cell  
345 bundles and myosin VI/VIIa positive cell bodies on day 6 post-DT treatment. On day 7 post-  
346 DT, saccules and utricles exhibited an increase in short, immature-like bundles, and an  
347 increase in hair cell bundle density. The increase in phalloidin labelled stereocilia  
348 corresponded to an increase in myosin VI/VIIa positive cell bodies (**Figure 4**). The pattern  
349 of hair cell bundle density and intensity using phalloidin labeling remained consistent after  
350 day 8 in the saccule and utricle, although there was some variability in fluorescence  
351 intensity using myosin VI/VIIa labeling. The hair cells return to control levels by 13 days  
352 post-DT (**Figure 5**).

353  
354 *Hair cell apoptosis is triggered by DT treatment in hDTR transgenic fish*

355  
356 Apoptosis results in cleavage of caspase-3. Therefore, to test whether hair cells in treated  
357 Tg(*myo6b*:hDTR) fish were undergoing apoptosis, we stained for cleaved caspase-3 on DT  
358 treated fish. In the utricle and saccule of DT treated Tg(*myo6b*:hDTR) fish, we observed  
359 cleaved caspase-3-positive cells 1 day post-DT and the number of cleaved caspase-3  
360 positive cells significantly increased by day 2 post-DT (**Figure 6**). The number of cleaved  
361 caspase-3 positive cells declined on day 3 post-DT and each day thereafter examined  
362 (**Figure 6B**). We conclude that at least some of the hair cell death is due to apoptosis and  
363 cell death is initiated as early as 24 hours post DT treatment.

364  
365 **Conclusions**

366  
367 We show that a stable zebrafish line expressing the human diphtheria toxin receptor in a  
368 tissue-specific fashion, can be successfully applied to the analysis of hair cell regeneration  
369 in the zebrafish adult inner ear and larval lateral line systems. Incubation of larvae or adult  
370 injection of DT was utilized to achieve hair cell specific ablation in zebrafish expressing  
371 hDTR under the control of the *myo6b* promoter. With this technique, we observe a delay in  
372 cell death which is likely due to the mechanism of action for diphtheria toxin. DT binds to the  
373 toxin receptor, it internalizes, and the catalytic A subunit acts as an inhibitor of protein  
374 synthesis and arrests RNA synthesis, which ultimately leads to apoptosis or cell death  
375 (Collier R. J.,1975). A potential drawback of the system is the extreme potency of the toxin  
376 which can cause “off site injuries.” Studies which express diphtheria toxin A fragment (DTA)  
377 in zebrafish embryos in the retina (Kurita et al., 2003) and in germline (Slanchev et al.,  
378 2005) resulted in undesired ablation of other cells and even death of the organism due to  
379 DT toxicity. However, we find that cell specific expression of the human diphtheria toxin  
380 receptor in hair cells using the *myo6b* promoter causes no morphological defects in  
381 comparison to wild-type fish. Moreover, diphtheria toxin can be administered at low enough



382 doses to cause cell specific ablation with limited to no toxicity in other cells and no  
383 noticeable toxicity to the animal.

384

### 385 *Comparison with other adult zebrafish models for hair cell ablation*

386

387 At least 3 additional zebrafish models have been used to ablate hair cells in the adult inner  
388 ear. Immediately following cessation of sound exposure (to 100 Hz pure tone at 179 dB re 1  
389  $\mu$ Pa RMS) for 36 h results in a 75% reduction in stereocilia density of the auditory hair cells  
390 in saccules. These sound exposure experiments significantly decrease hair cells to 43% in  
391 the caudal region and 75% of the total distance from the rostral tip. Specifically, sound  
392 exposure produces hair bundle loss only in the caudal region of the saccule and then 2  
393 days later noticeable bundle loss is seen in the central portion of the rostral region (25%) 0  
394 and 2 days post sound exposure (Schuck et al., 2009). Similar to our observations using  
395 DTR-fish treated with DT, auditory hair cell regeneration is observed 2 days post sound  
396 exposure. Aminoglycoside administration using a single intraperitoneal injection of a high  
397 dose of gentamicin induces only a noticeable reduction in sensory hair cell loss across the  
398 entire saccule and utricle, accompanied by shifts in auditory thresholds (Uribe et al., 2013).  
399 It is not shown whether hair cells replenish following gentamicin exposure. In contrast to  
400 both acoustic and ototoxic exposure, we observe near complete hair cell loss throughout  
401 the auditory and vestibular sensory epithelia followed by regeneration of hair cells. The  
402 Tg(*myo6b*:hDTR) zebrafish and DT system represents an ideal method for hair cell ablation  
403 in a regeneration study as the method induces synchronous destruction of all hair cells with  
404 negligible effects on neighboring inner ear cells. Moreover, this system is reversible to  
405 permit hair cell regeneration.

406

407 Most hair cell regeneration studies have been implemented using the larval lateral line  
408 systems. However, the larval lateral line system and inner ear hair cells are not identical  
409 and examination of adult inner ears could have significant differences relevant to potential  
410 therapeutic treatments. The Tg(*myo6b*:hDTR) fish will enable examination of adult  
411 behaviors associated with auditory dysfunction and equilibrium orientation defects. DT  
412 treated Tg(*myo6b*:hDTR) adult zebrafish have defects similar to those seen in human  
413 hereditary and environmentally induced forms of deafness which may serve as a model for  
414 such disorders since zebrafish are accessible to a wide range and levels of analyses. This  
415 method can uncover roles of specific tissues during development, homeostasis, and aging.  
416 Analysis of recovery after cell ablation may also reveal novel cellular and molecular  
417 mechanisms underlying the regenerative processes, thus bringing insights to the field of  
418 regenerative medicine.

419

420 **Figures**

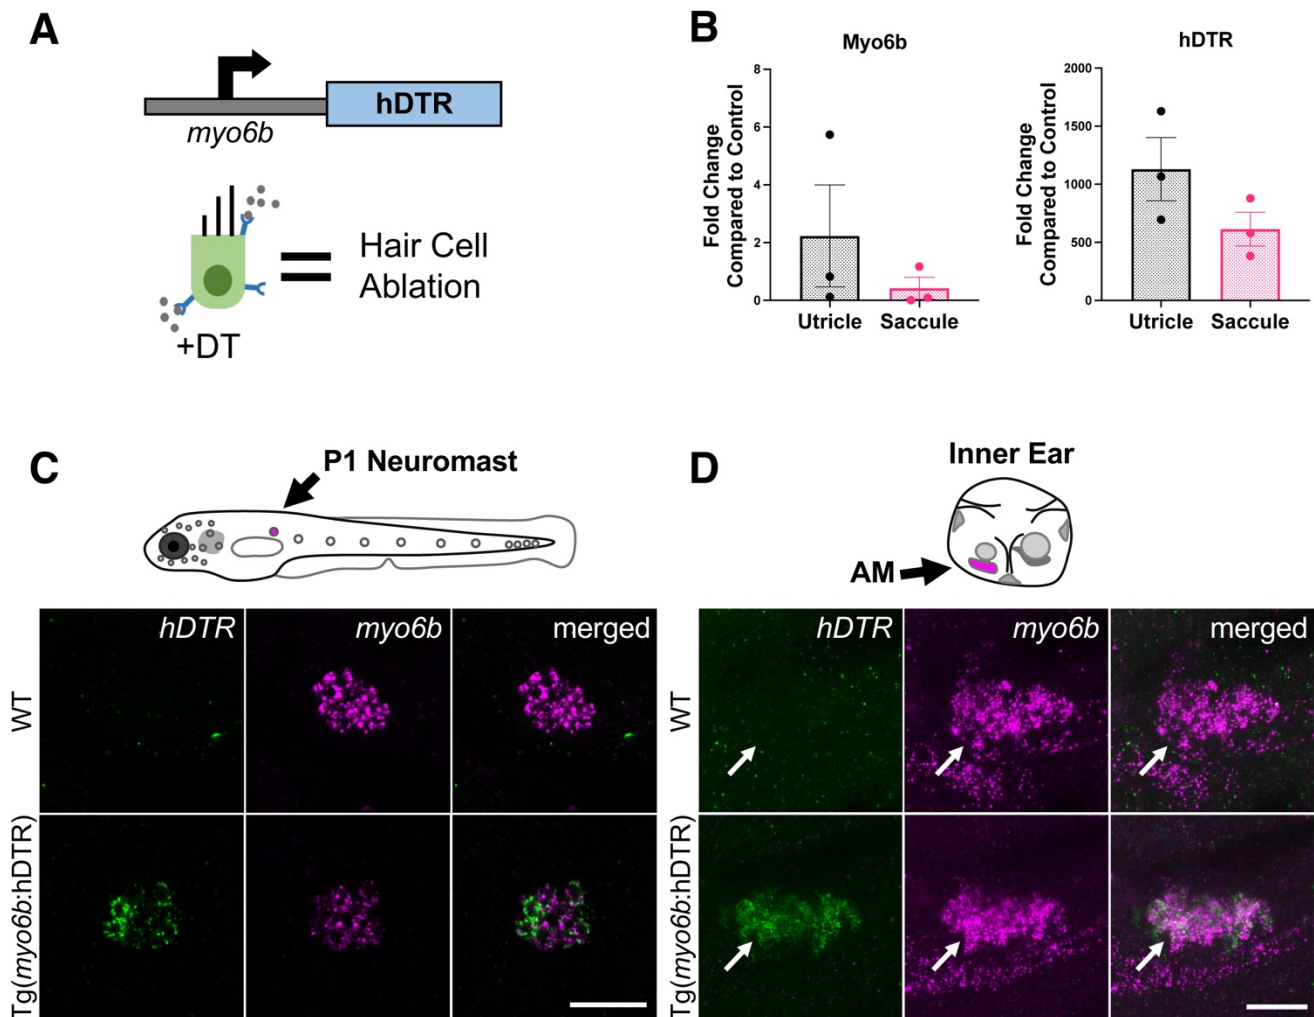

421  
 422 **Figure 1. The Tg(*myo6b*:hDTR) zebrafish.** (A) Schematic representation of the hDTR  
 423 construct driven by the hair cell-specific *myo6b* promoter and representation of the hair cell-  
 424 specific ablation approach. DT is internalized in cells specifically expressing the human  
 425 version of the diphtheria toxin receptor, triggering cell death. (B) qRT-PCR analysis on  
 426 untreated Tg(*myo6b*:hDTR) zebrafish sacculle and utricle showing expression of *hDTR* and  
 427 *myo6b* relative to wild-type animals. The values are represented as the mean  $\pm$  SEM from 3  
 428 independent samples. (C) Schematic depicts a lateral view of a whole zebrafish larva with  
 429 neuromasts (gray circles). The P1 neuromast examined for imaging is indicated by magenta  
 430 fill. *In situ* HCR using probes targeting *hDTR* and *myo6b* in hair cells of a single P1 neuromast  
 431 of 3 dpf wild-type (WT) and Tg(*myo6b*:hDTR) embryos is shown. Brightness and contrast  
 432 adjusted 50% and 25%, respectively. Scale bar 20  $\mu$ m. (D) Schematic depicts the left ear of  
 433 a larval zebrafish with anterior macula indicated by magenta fill. Lateral views of inner ears  
 434 are shown following HCR *in situ* with probes targeting *hDTR* and *myo6b* in 3 dpf wild-type  
 435 (WT) and Tg(*myo6b*:hDTR) embryos. Brightness and contrast adjusted 65% and 35%,  
 436 respectively. Scale bar 20  $\mu$ m.  
 437

**A**

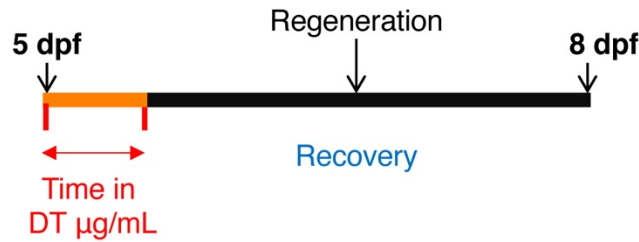

**B**

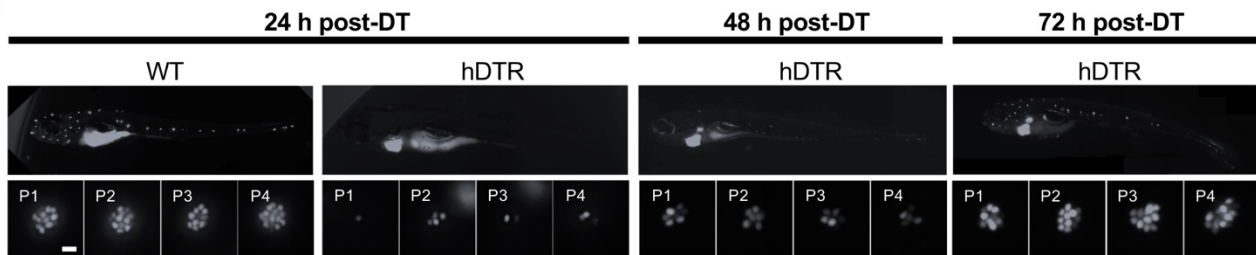

**C**

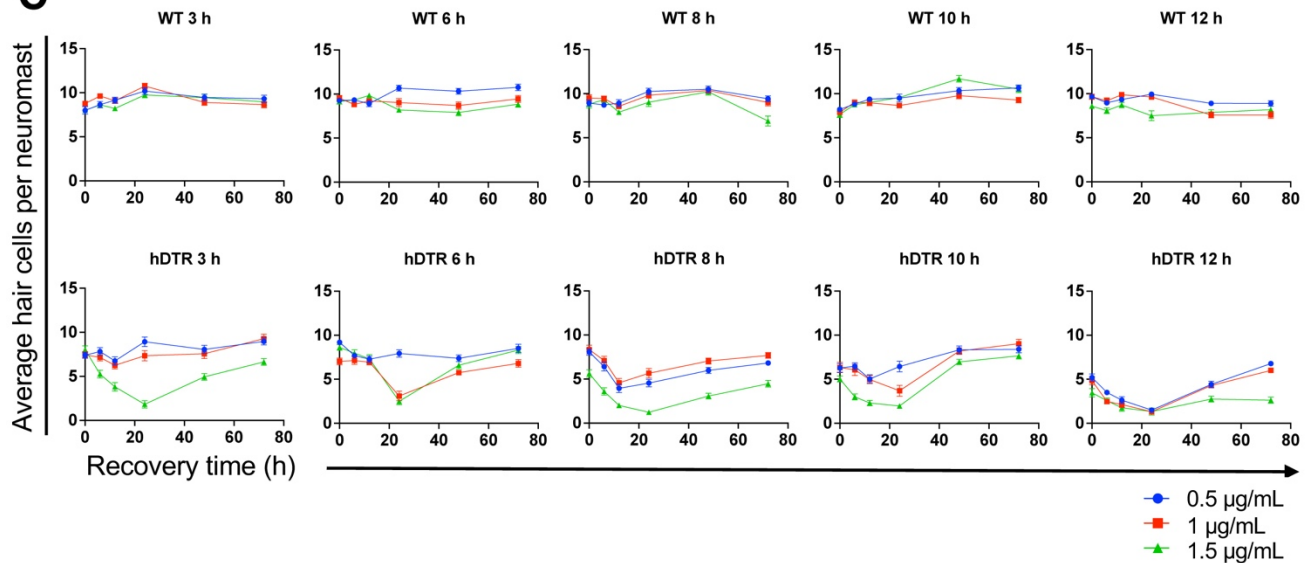

438

439

440 **Figure 2. *Tg(myo6b:hDTR)* larval zebrafish show hair cell loss and regeneration in**  
441 **lateral line neuromasts after *in vivo* DT treatment.** (A) Schematic representation of the  
442 larval DT exposure treatment. (B) Regeneration time-course showing P1-P4 over three days  
443 of recovery. Larvae were exposed to 1  $\mu\text{g/mL}$  of DT for 6 h. Scale bar 100  $\mu\text{m}$ . (C) Wild-type  
444 (WT) and *Tg(myo6b:hDTR)* (hDTR) larvae were exposed to three concentrations of DT (0.5  
445  $\mu\text{g/mL}$ , 1  $\mu\text{g/mL}$ , and 1.5  $\mu\text{g/mL}$ ) for various durations (3 h, 6 h, 8 h, 10 h, 12 h). Neuromast  
446 viability was monitored daily by YO-PRO-1 labelling 0 h to 72 h post-incubation. Shown is the  
447 quantification of YO-PRO-1 labeled hair cells. The values are represented as the mean  $\pm$   
448 SEM from 8 fish.

448

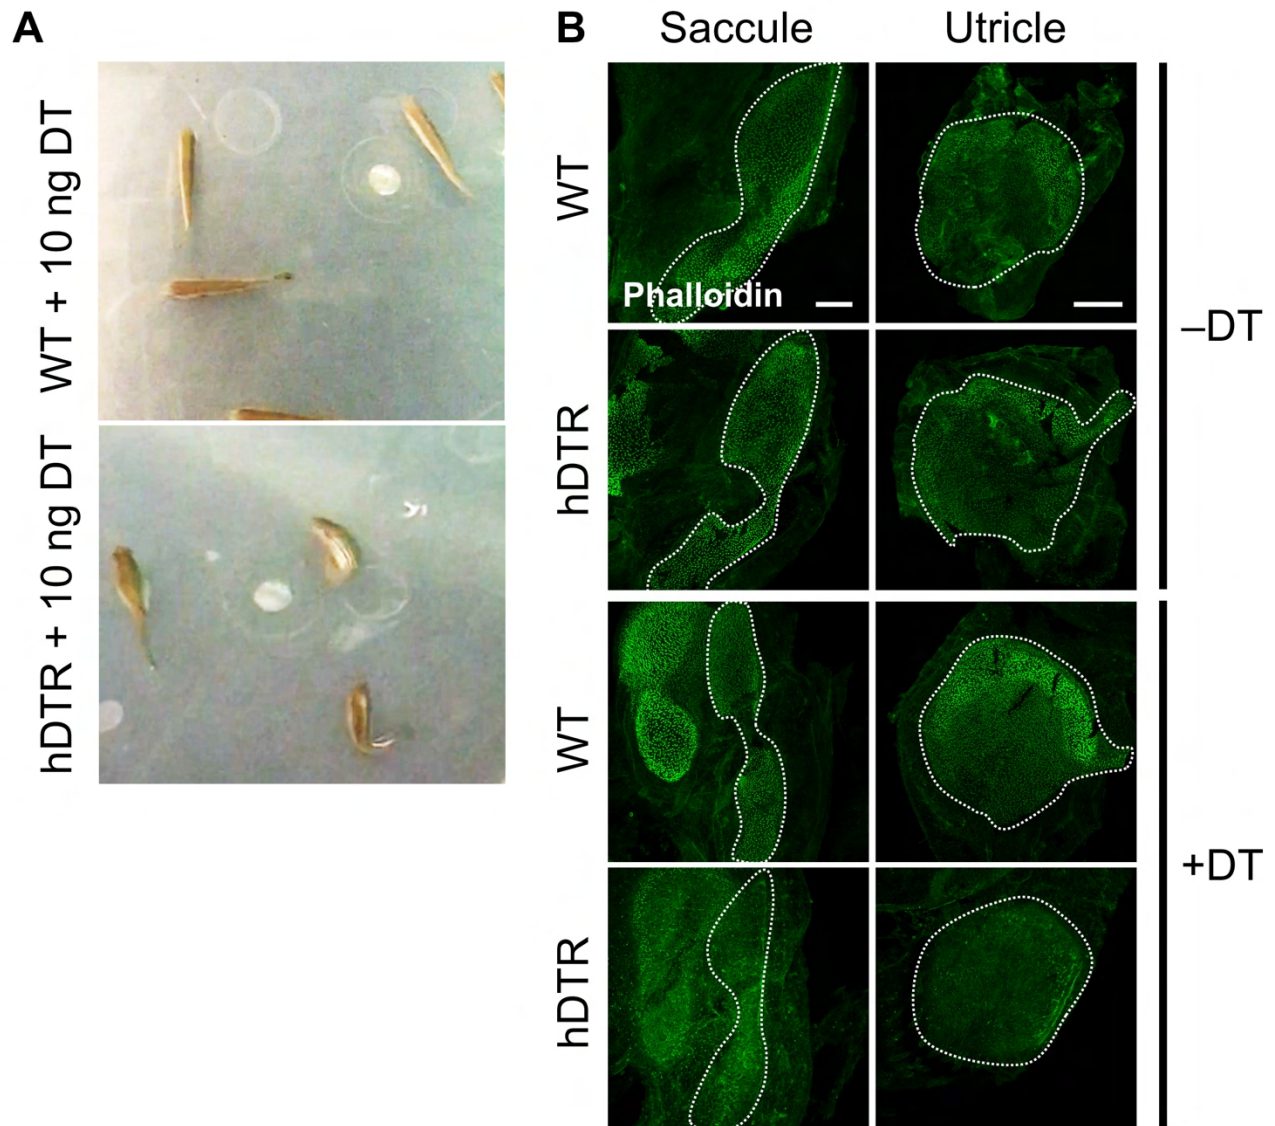

449  
450  
451  
452  
453  
454  
455

**Figure 3. Adult *Tg(myo6b:hDTR)* injected fish exhibit spatial disorientation and impaired balance.** (A) Injected wild-type fish (WT, top) and *Tg(myo6b:hDTR)* (hDTR, bottom) with 10 ng of DT 3 days-post injection. (B) Saccule and utricle from untreated (-DT) or treated (+DT) wild-type and *Tg(myo6b:hDTR)* fish. Saccule and utricle from treated(+DT) wild-type and *Tg(myo6b:hDTR)* fish were isolated 3 days post-DT. Scale bar 100  $\mu$ m.

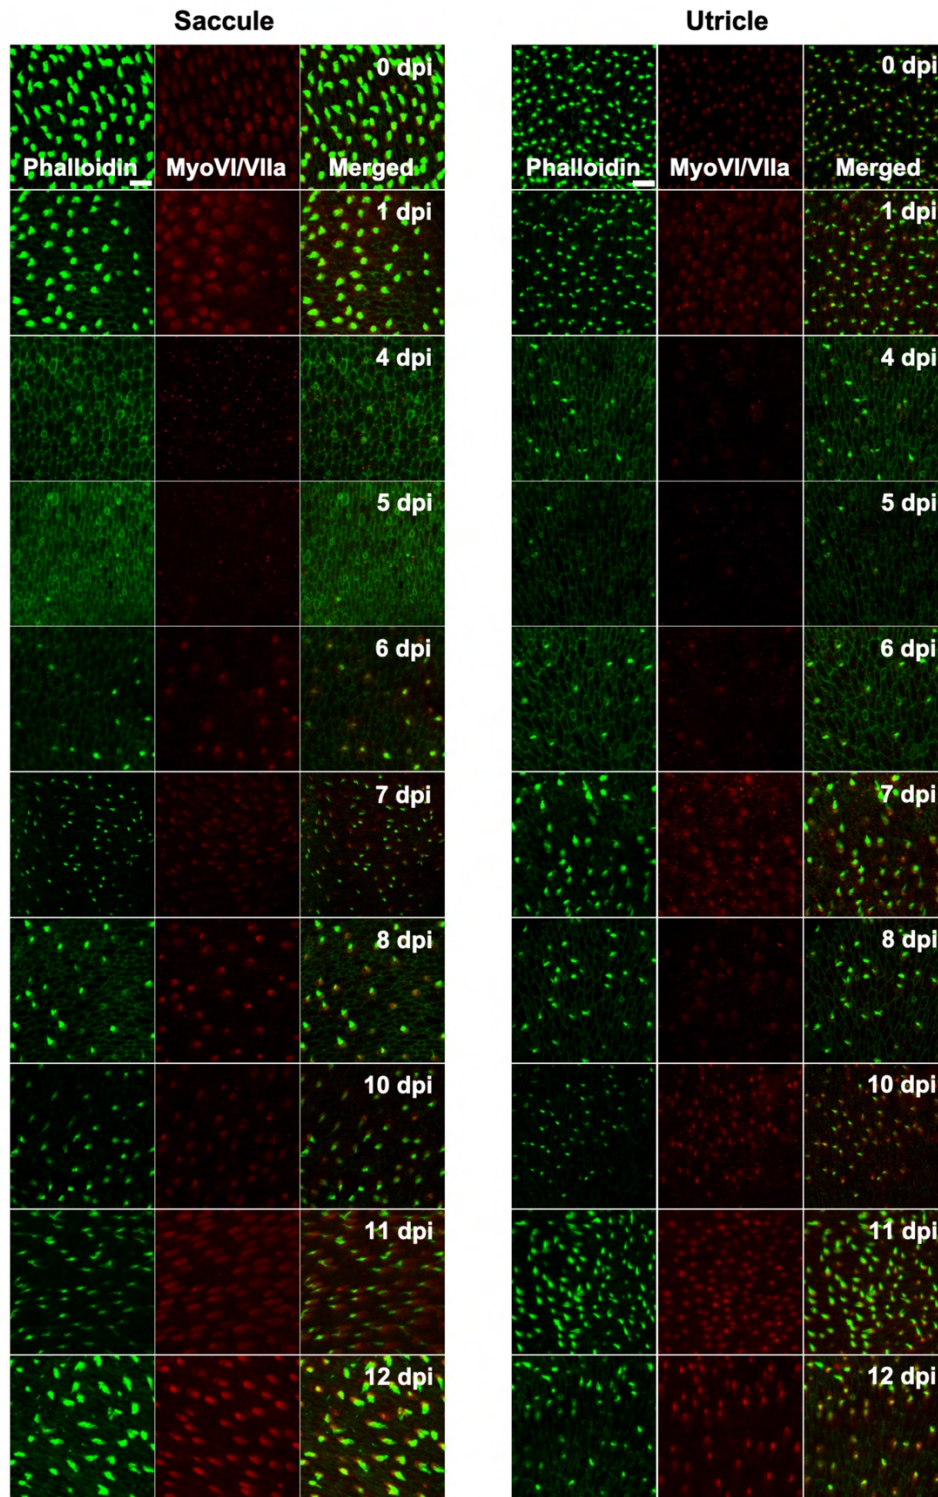

456  
457  
458  
459  
460  
461  
462  
463

**Figure 4. *Tg(myo6b:hDTR)* adult zebrafish hair cell loss and regeneration in the inner ear after DT treatment.** Saccule and utricle were isolated at specified timepoints following DT administration in *Tg(myo6b:hDTR)* fish. Close examination of hair cells with phalloidin (green channel) and hair cell bodies with anti-myosin VI/VIIa (red channel). Scale bar 100  $\mu$ m. For qualitative purposes, brightness was increased 10% and contrast by 20% across all images.

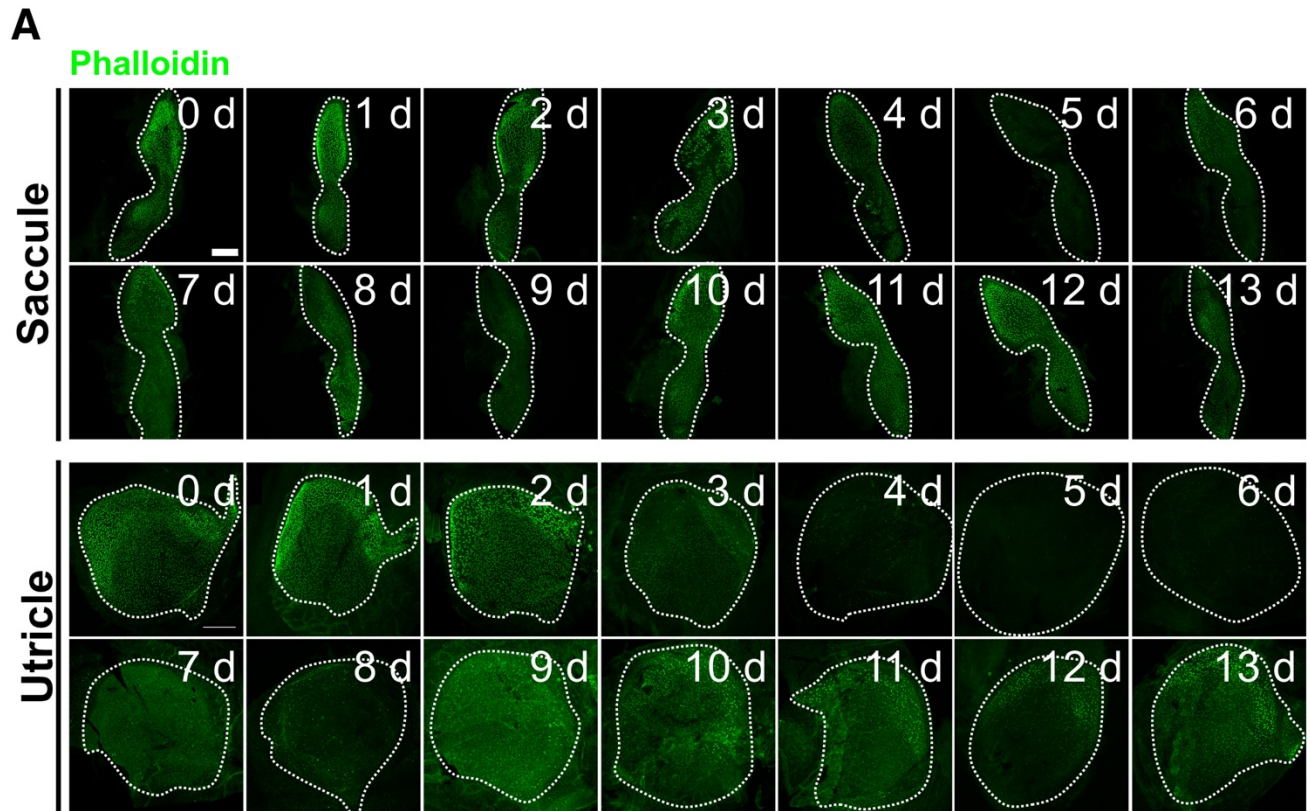

**B** Phalloidin Positive Cells

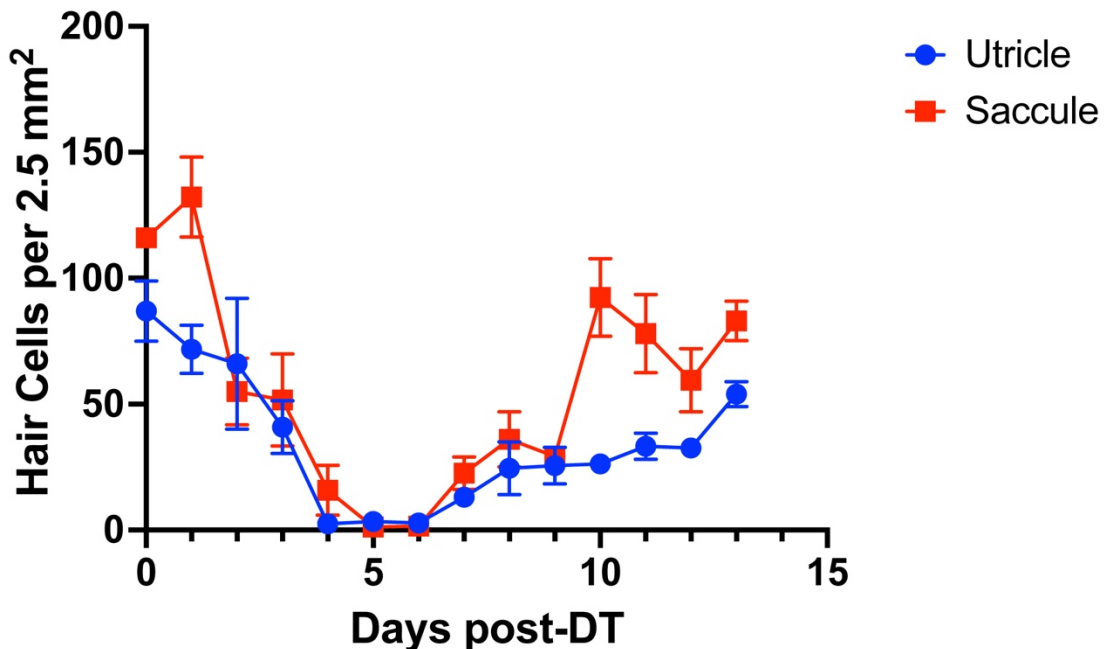

464  
465  
466  
467  
468  
469  
470

**Figure 5. *Tg(myo6b:hDTR)* adult zebrafish hair cell loss and regeneration in the inner ear after DT treatment. (A)** *Tg(myo6b:hDTR)* saccule and utricle used for quantification were isolated at specified timepoints following DT administration and hair cells were labeled with phalloidin (green channel). Scale bar 100  $\mu$ m. **(B)** Quantification of phalloidin positive hair cell number after DT injection. Error bars demonstrate the mean  $\pm$  SEM.

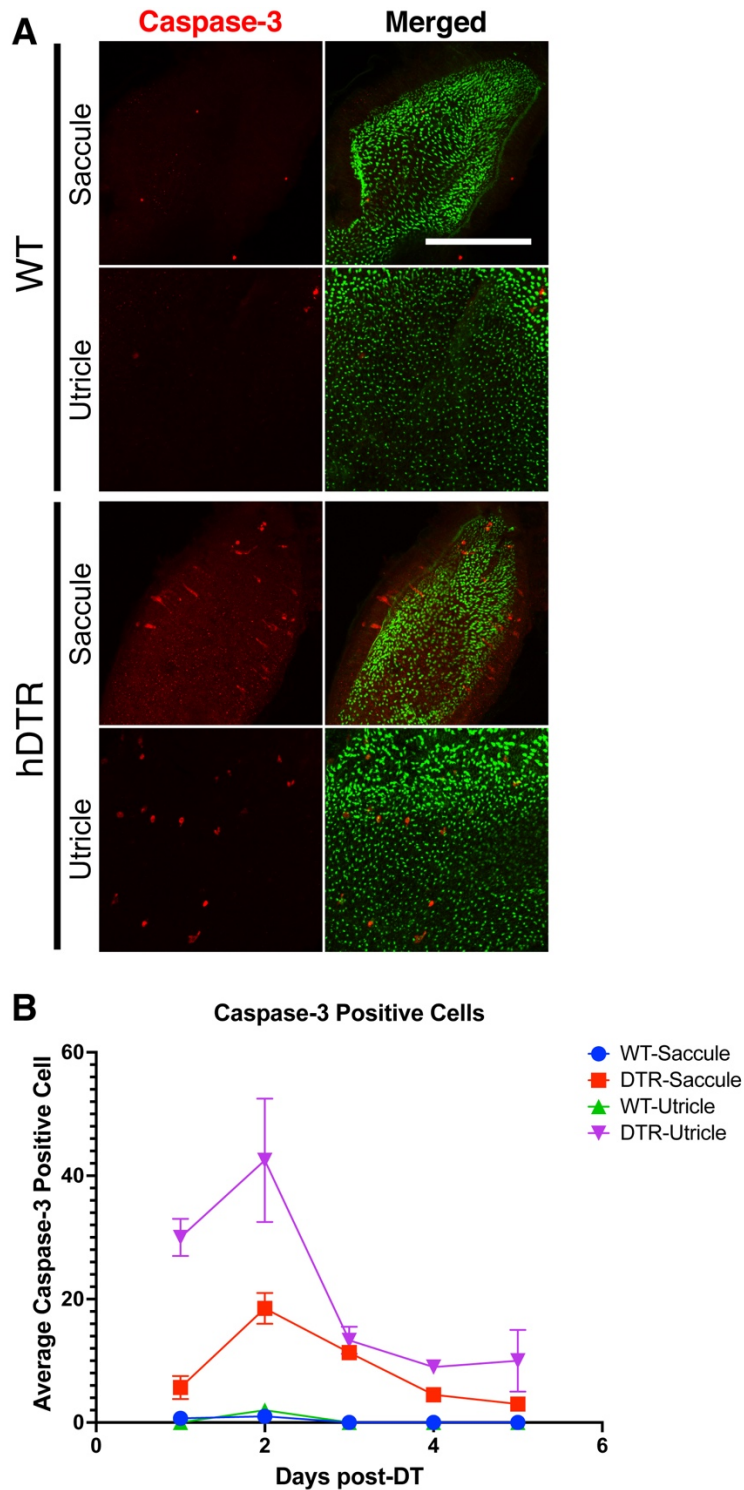

471  
472 **Figure 6. DT induced hair cell death is primarily due to apoptosis. (A)** Saccule and utricule  
473 from wild-type (WT) and *Tg(myo6b:hDTR)* (hDTR) inner ear tissues 2 days post-DT. Hair  
474 cells are labeled with phalloidin (green channel) and cleaved caspase-3 (red channel) positive  
475 cells were detected 2 days post-DT. **(B)** Quantification of cleaved caspase-3 positive cells in  
476 saccule and utricule dissected on days 1 to 5 following DT injection. Scale bar 100  $\mu$ m. For  
477 qualitative purposes, brightness and contrast increased by 20%.  
478

479 **Conflict of Interest**

480 The authors declare no competing interests.

481 **Author Contributions**

482 EJ and SMB designed the experiments and wrote the manuscript. EJ, CS, and LC-C  
483 performed the experiments.

484 **Funding**

485 This research was supported by the Intramural Research Program of the National Human  
486 Genome Research Institute (ZIAHG200386-06).

487

488 **Acknowledgments**

489

490 We thank Dr. Katie Kindt for generously donating the 5' entry *myo6b* clone; Blake  
491 Carrington and Raman Sood for assistance with cell injections; Stephen Frederickson and  
492 Dr. Tannia Clark, and Charles River for zebrafish care; and the members of the Burgess  
493 laboratory for helpful discussion. All animal experiments were approved by the National  
494 Human Genome Research Institute's Animal Care and Use Committee (protocol #G-01-3).

495



496 **References**

- 497
- 498 Bever, M. M., & Fekete, D. M. (2002). Atlas of the developing inner ear in zebrafish. *Dev*  
499 *Dyn*, 223(4), 536-543. <https://doi.org/10.1002/dvdy.10062>
- 500
- 501 Bucks, S. A., Cox, B. C., Vlosich, B. A., Manning, J. P., Nguyen, T. B., & Stone, J. S.  
502 (2017). Supporting cells remove and replace sensory receptor hair cells in a balance organ  
503 of adult mice. *Elife*, 6. <https://doi.org/10.7554/eLife.18128>
- 504
- 505 Burns, J. C., Cox, B. C., Thiede, B. R., Zuo, J., & Corwin, J. T. (2012). In vivo proliferative  
506 regeneration of balance hair cells in newborn mice. *J Neurosci*, 32(19), 6570-6577.  
507 <https://doi.org/10.1523/JNEUROSCI.6274-11.2012>
- 508
- 509 Choi, H. M., Calvert, C. R., Husain, N., Huss, D., Barsi, J. C., Deverman, B. E., Hunter, R.  
510 C., Kato, M., Lee, S. M., Abelin, A. C., Rosenthal, A. Z., Akbari, O. S., Li, Y., Hay, B. A.,  
511 Sternberg, P. W., Patterson, P. H., Davidson, E. H., Mazmanian, S. K., Prober, D. A., van  
512 de Rijn, M., Leadbetter, J. R., Newman, D. K., Readhead, C., Bronner, M. E., Wold, B.,  
513 Lansford, R., Sauka-Spengler, T., Fraser, S. E., & Pierce, N. A. (2016). Mapping a  
514 multiplexed zoo of mRNA expression. *Development*, 143(19), 3632-3637.  
515 <https://doi.org/10.1242/dev.140137>
- 516
- 517 Coffin, A. B., Dabdoub, A., Kelley, M. W., & Popper, A. N. (2007). Myosin VI and VIIa  
518 distribution among inner ear epithelia in diverse fishes. *Hear Res*, 224(1-2), 15-26.  
519 <https://doi.org/10.1016/j.heares.2006.11.004>
- 520
- 521 Collier, R. J. (1975). Diphtheria toxin: mode of action and structure. *Bacteriol Rev*, 39(1),  
522 54-85. <https://doi.org/10.1128/br.39.1.54-85.1975>
- 523
- 524 Golub, J. S., Tong, L., Ngyuen, T. B., Hume, C. R., Palmiter, R. D., Rubel, E. W., & Stone,  
525 J. S. (2012). Hair cell replacement in adult mouse utricles after targeted ablation of hair cells  
526 with diphtheria toxin. *J Neurosci*, 32(43), 15093-15105.  
527 <https://doi.org/10.1523/JNEUROSCI.1709-12.2012>
- 528
- 529 Higgs, D. M., Souza, M. J., Wilkins, H. R., Presson, J. C., & Popper, A. N. (2002). Age- and  
530 size-related changes in the inner ear and hearing ability of the adult zebrafish (*Danio rerio*).  
531 *J Assoc Res Otolaryngol*, 3(2), 174-184. <https://doi.org/10.1007/s101620020035>
- 532
- 533 Kawakami, K., Shima, A., & Kawakami, N. (2000). Identification of a functional transposase  
534 of the Tol2 element, an Ac-like element from the Japanese medaka fish, and its  
535 transposition in the zebrafish germ lineage. *Proc Natl Acad Sci U S A*, 97(21), 11403-11408.  
536 <https://doi.org/10.1073/pnas.97.21.11403>
- 537
- 538 Kindt, K. S., Finch, G., & Nicolson, T. (2012). Kinocilia mediate mechanosensitivity in  
539 developing zebrafish hair cells. *Dev Cell*, 23(2), 329-341.  
540 <https://doi.org/10.1016/j.devcel.2012.05.022>
- 541
- 542 Kurita, R., Sagara, H., Aoki, Y., Link, B. A., Arai, K., & Watanabe, S. (2003). Suppression of  
543 lens growth by alphaA-crystallin promoter-driven expression of diphtheria toxin results in

- 544 disruption of retinal cell organization in zebrafish. *Dev Biol*, 255(1), 113-127.  
545 [https://doi.org/10.1016/s0012-1606\(02\)00079-9](https://doi.org/10.1016/s0012-1606(02)00079-9)  
546
- 547 Liang, J., & Burgess, S. M. (2009). Gross and fine dissection of inner ear sensory epithelia  
548 in adult zebrafish (*Danio rerio*). *J Vis Exp*(27). <https://doi.org/10.3791/1211>  
549
- 550 Liang, J., Wang, D., Renaud, G., Wolfsberg, T. G., Wilson, A. F., & Burgess, S. M. (2012).  
551 The stat3/socs3a pathway is a key regulator of hair cell regeneration in zebrafish.  
552 [corrected]. *J Neurosci*, 32(31), 10662-10673. [https://doi.org/10.1523/JNEUROSCI.5785-](https://doi.org/10.1523/JNEUROSCI.5785-10.2012)  
553 [10.2012](https://doi.org/10.1523/JNEUROSCI.5785-10.2012)  
554
- 555 Matern, M. S., Beirl, A., Ogawa, Y., Song, Y., Paladugu, N., Kindt, K. S., & Hertzano, R.  
556 (2018). Transcriptomic Profiling of Zebrafish Hair Cells Using RiboTag. *Front Cell Dev Biol*,  
557 6, 47. <https://doi.org/10.3389/fcell.2018.00047>  
558
- 559 Nicolson, T. (2005). The genetics of hearing and balance in zebrafish. *Annu Rev Genet*, 39,  
560 9-22. <https://doi.org/10.1146/annurev.genet.39.073003.105049>  
561
- 562 Nicolson, T., Rusch, A., Friedrich, R. W., Granato, M., Ruppertsberg, J. P., & Nusslein-  
563 Volhard, C. (1998). Genetic analysis of vertebrate sensory hair cell mechanosensation: the  
564 zebrafish circler mutants. *Neuron*, 20(2), 271-283. [https://doi.org/10.1016/s0896-](https://doi.org/10.1016/s0896-6273(00)80455-9)  
565 [6273\(00\)80455-9](https://doi.org/10.1016/s0896-6273(00)80455-9)  
566
- 567 Obholzer, N., Wolfson, S., Trapani, J. G., Mo, W., Nechiporuk, A., Busch-Nentwich, E.,  
568 Seiler, C., Sidi, S., Sollner, C., Duncan, R. N., Boehland, A., & Nicolson, T. (2008).  
569 Vesicular glutamate transporter 3 is required for synaptic transmission in zebrafish hair  
570 cells. *J Neurosci*, 28(9), 2110-2118. <https://doi.org/10.1523/JNEUROSCI.5230-07.2008>  
571
- 572 Pfeiffer, W. (1964). Equilibrium Orientation in Fish1 1In memoriam Prof. Dr. Erich von Hoist.  
573 In W. J. L. Felts & R. J. Harrison (Eds.), *International Review of General and Experimental*  
574 *Zoology* (Vol. 1, pp. 77-111). Elsevier. [https://doi.org/https://doi.org/10.1016/B978-1-4831-](https://doi.org/https://doi.org/10.1016/B978-1-4831-9977-1.50008-0)  
575 [9977-1.50008-0](https://doi.org/https://doi.org/10.1016/B978-1-4831-9977-1.50008-0)  
576
- 577 Popper, A. N., & Fay, R. R. (1993). Sound detection and processing by fish: critical review  
578 and major research questions. *Brain Behav Evol*, 41(1), 14-38.  
579 <https://doi.org/10.1159/000113821>  
580
- 581 Schindelin, J., Arganda-Carreras, I., Frise, E., Kaynig, V., Longair, M., Pietzsch, T.,  
582 Preibisch, S., Rueden, C., Saalfeld, S., Schmid, B., Tinevez, J. Y., White, D. J., Hartenstein,  
583 V., Eliceiri, K., Tomancak, P., & Cardona, A. (2012). Fiji: an open-source platform for  
584 biological-image analysis. *Nat Methods*, 9(7), 676-682. <https://doi.org/10.1038/nmeth.2019>  
585
- 586 Schuck, J. B., & Smith, M. E. (2009). Cell proliferation follows acoustically-induced hair cell  
587 bundle loss in the zebrafish saccule. *Hear Res*, 253(1-2), 67-76.  
588 <https://doi.org/10.1016/j.heares.2009.03.008>  
589
- 590 Slanchev, K., Stebler, J., de la Cueva-Mendez, G., & Raz, E. (2005). Development without  
591 germ cells: the role of the germ line in zebrafish sex differentiation. *Proc Natl Acad Sci U S*  
592 *A*, 102(11), 4074-4079. <https://doi.org/10.1073/pnas.0407475102>

593

594 Smith, M. E., Kane, A. S., & Popper, A. N. (2004). Noise-induced stress response and  
595 hearing loss in goldfish (*Carassius auratus*). *J Exp Biol*, 207(Pt 3), 427-435.

596 <https://doi.org/10.1242/jeb.00755>

597

598 Uribe, P. M., Sun, H., Wang, K., Asuncion, J. D., Wang, Q., Chen, C. W., Steyger, P. S.,  
599 Smith, M. E., & Matsui, J. I. (2013). Aminoglycoside-induced hair cell death of inner ear  
600 organs causes functional deficits in adult zebrafish (*Danio rerio*). *PLoS One*, 8(3), e58755.

601 <https://doi.org/10.1371/journal.pone.0058755>

602

603 Von Baumgarten, R. J., Baldrighi, G., Shillinger, G. L., Jr., Harth, O., & Thuemler, R. (1975).  
604 Vestibular function in the space environment. *Acta Astronaut*, 2(1-2), 49-58.

605 [https://doi.org/10.1016/0094-5765\(75\)90042-9](https://doi.org/10.1016/0094-5765(75)90042-9)

606

607 Wang, J., Yan, Z., Xing, Y., Lai, K., Wang, J., Yu, D., Shi, H., & Yin, S. (2019). A zebrafish  
608 model for hearing loss and regeneration induced by blast wave. *Journal of Bio-X Research*,  
609 2(2), 87-97. <https://doi.org/10.1097/jbr.0000000000000033>

610

## ***Supplementary Material***

### 611 **Supplementary Data**

#### 612 **Supplementary Video 1. DT induced hair cell death affects adult swimming behaviors.**

613 Injected wild-type fish (left panel) and Tg(*myo6b*:hDTR) with 10 ng of DT 3 days-post  
614 injection. Tg(*myo6b*:hDTR) display summersaulting and lateral looping when water is  
615 agitated.

616

617 **Supplementary Figures**

**A**

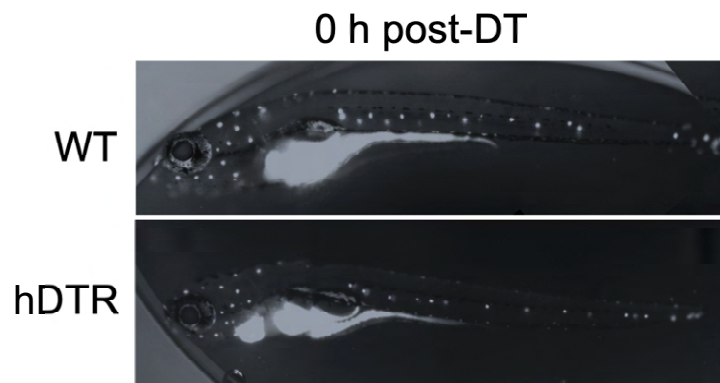

**B**

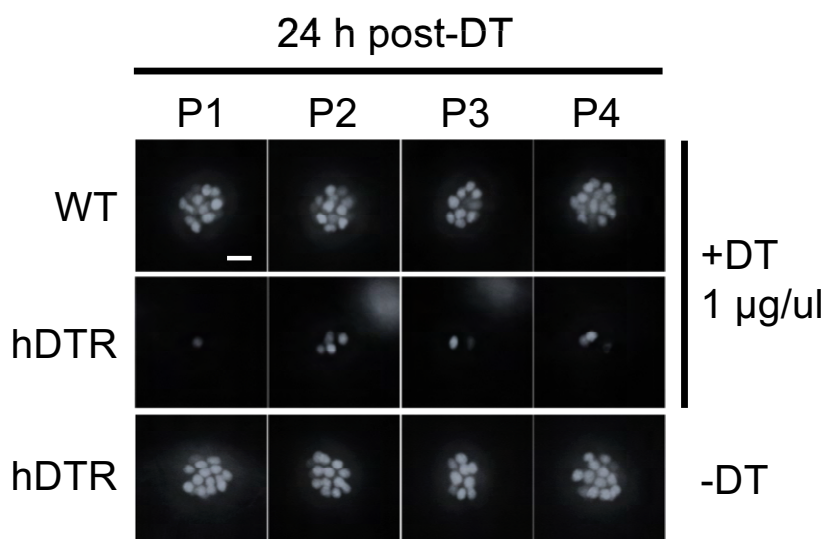

**C**

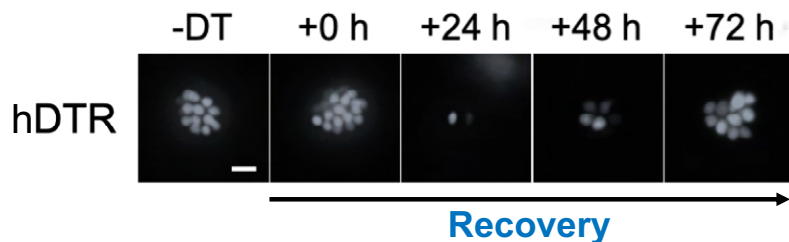

618 **Supplementary Figure 1. *Tg(myo6b:hDTR)* larval zebrafish show hair cell loss and**  
619 **regeneration in lateral line neuromasts after *in vivo* DT treatment.** Larvae were  
620 exposed to 1 µg/mL of DT for 6 h. Neuromast viability was monitored daily by YO-PRO-1  
621 labelling 0 h to 72 h post-DT incubation. The 1 µg/mL concentration and the 6 h duration of  
622 DT exposure was selected based on dose-dependent work in Figure 2. **(A)** Wild-type (WT)  
623 controls and *Tg(myo6b:hDTR)* larvae (hDTR) 0 h post-DT. **(B)** Neuromasts 24 h post-DT in  
624 WT and *Tg(myo6b:hDTR)* larvae. **(C)** Regeneration time-course showing P3 neuromast of  
625 *Tg(myo6b:hDTR)* larvae treated with DT. Scale bar 100 µm.

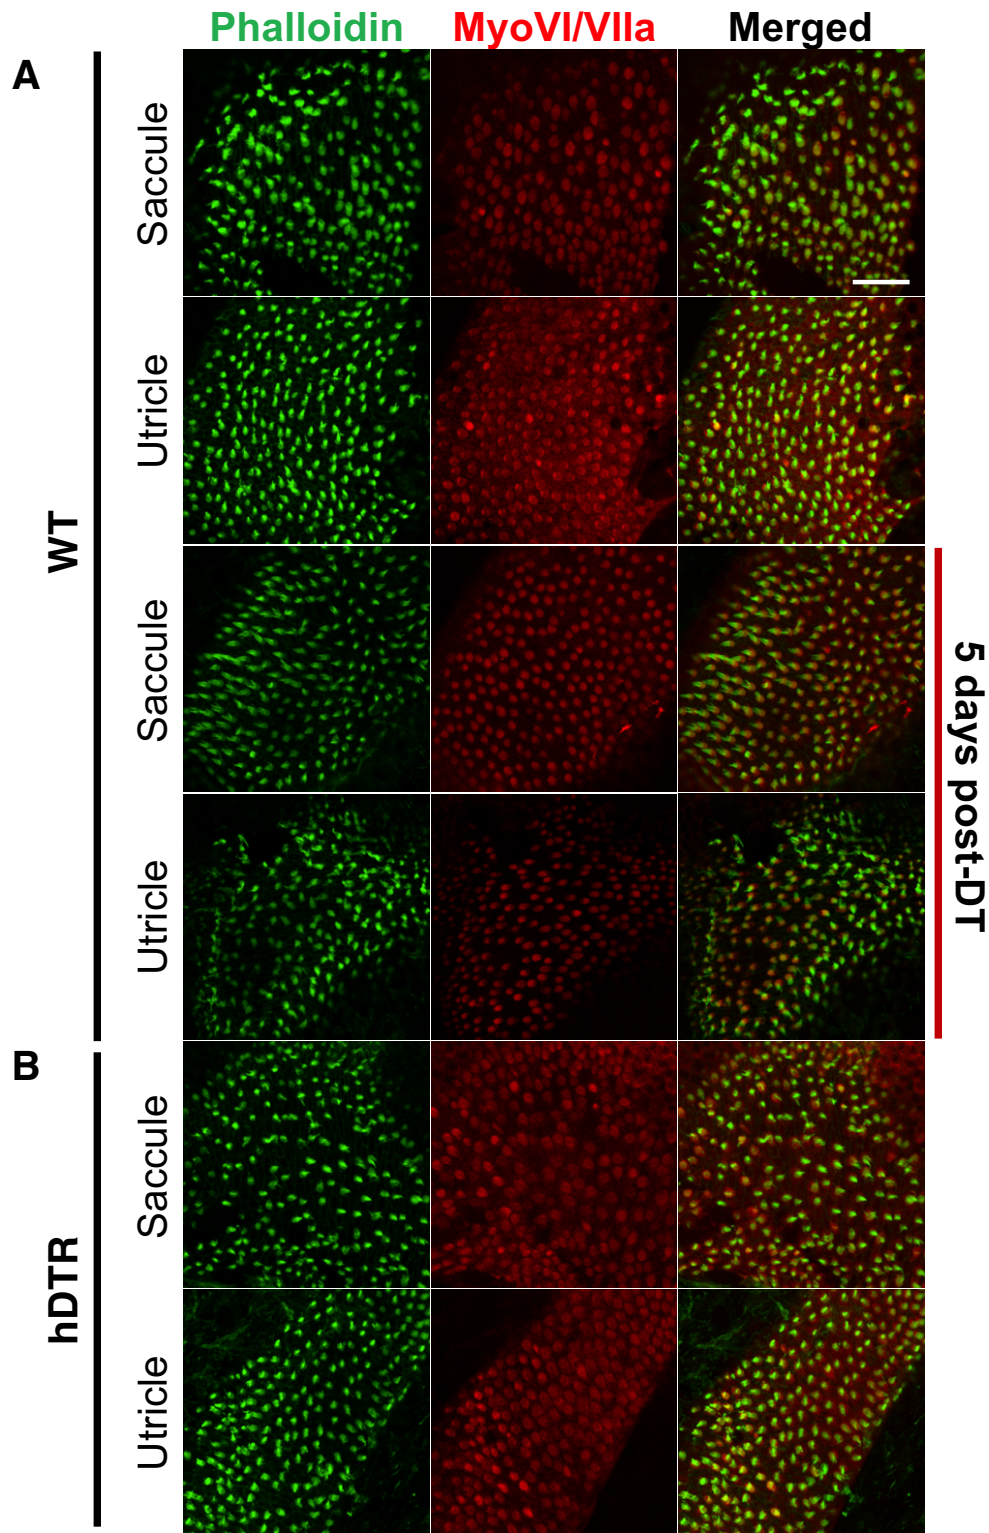

626  
628  
629  
630  
631  
632  
633

**Supplementary Figure 2. Tg(*myo6b*:hDTR) sensory epithelia. (A)** Untreated and treated saccule and utricle from wild-type fish (WT). Saccule and utricle were isolated from treated wild-type fish 5 days post-DT. **(B)** Untreated saccule and utricle from Tg(*myo6b*:hDTR) fish (hDTR). Close examination of hair cells with phalloidin (green channel) and hair cell bodies with anti-myosin VI/VIIa (red channel). Scale bar 20  $\mu$ m.
